# Supplementary material
Source: PubMed Central journal article supplement (PMC5614706)
Supplement: NIHMS903711-supplement-supplement_1.pdf [file NIHMS903711-supplement-supplement_1.pdf]

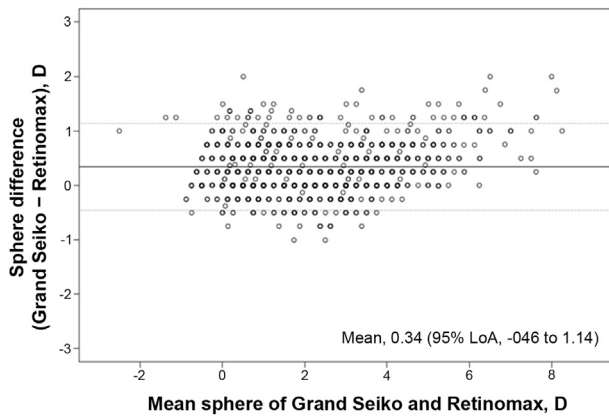

**eFIG 1.** Bland-Altman plot for sphere measurement from the Grand Seiko and Retinomax autorefractors.

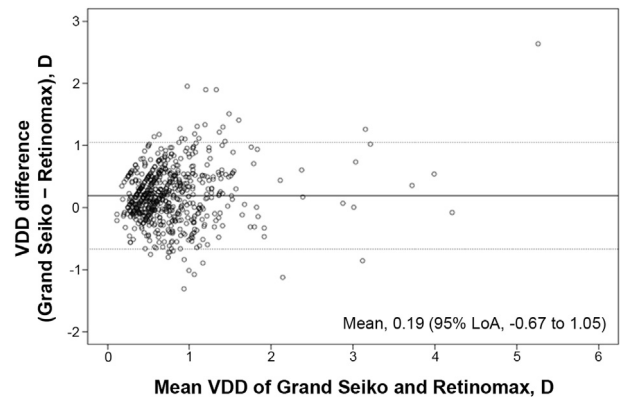

**eFIG 4.** Bland-Altman plot for vector dioptric difference from the Grand Seiko and Retinomax autorefractors.

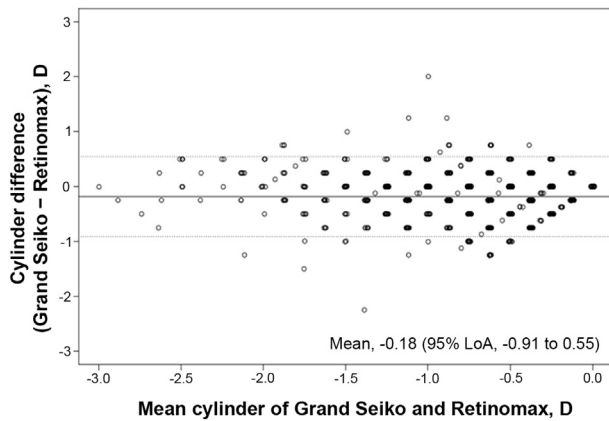

**eFIG 2.** Bland-Altman plot for cylinder measurement from the Grand Seiko and Retinomax autorefractors.

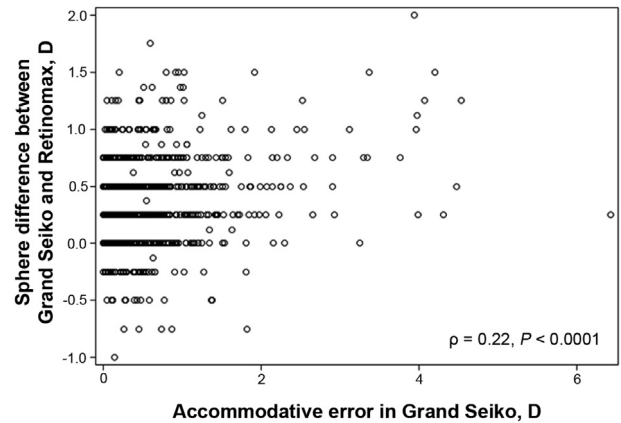

**eFIG 5.** Scatterplot of accommodative error versus sphere difference between cycloplegic Grand Seiko and Retinomax autorefractors.

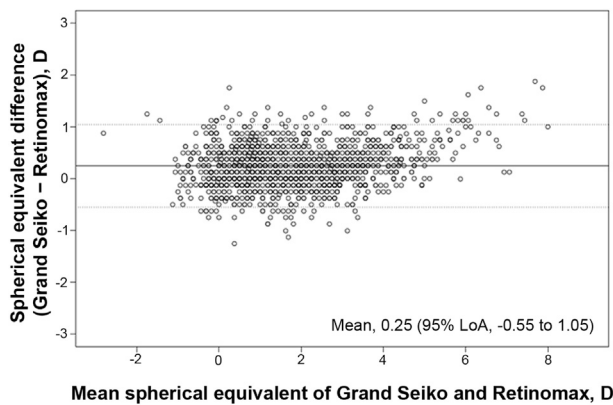

**eFIG 3.** Bland-Altman plot for spherical equivalent from the Grand Seiko and Retinomax autorefractors.

eTable 1. Characteristics of study participants eligible for analysis (N = 702)

| Characteristic                 | Eligible, no. (%) |
|--------------------------------|-------------------|
| Age, months                    |                   |
| ≤53                            | 173 (24.6)        |
| 54-59                          | 241 (34.3)        |
| 60-65                          | 218 (31.1)        |
| 66 to <72                      | 70 (9.8)          |
| Sex                            |                   |
| Female                         | 375 (53.4)        |
| Male                           | 327 (46.6)        |
| Ethnicity                      |                   |
| Hispanic or Latino             | 190 (27.1)        |
| Not Hispanic or Latino         | 495 (70.5)        |
| Unable to answer               | 17 (2.4)          |
| Race                           |                   |
| African American               | 487 (69.4)        |
| White                          | 72 (10.3)         |
| Multiple/other                 | 10 (1.4)          |
| Unable to answer               | 133 (19.0)        |
| Head Start                     |                   |
| No                             | 32 (4.6)          |
| Yes                            | 670 (95.4)        |
| Eligibility for VIP-HIP        |                   |
| Not eligible                   | 268 (38.2)        |
| Eligible: emmetropia           | 221 (31.5)        |
| Eligible: hyperopia            | 213 (30.3)        |
| Suspected amblyopia            |                   |
| No                             | 671 (95.6)        |
| Yes                            | 31 (4.4)          |
| Strabismus at distance or near |                   |
| No                             | 694 (98.9)        |
| Yes                            | 8 (1.1)           |

D, diopter; SD, standard deviation.

eTable 2. Agreement of refractive error measurements between cycloplegic Grand Seiko and cycloplegic Retinomax (N = 702 children; 1404 eyes)

|                               | Grand Seiko<br>Mean ± SD | Retinomax<br>Mean ± SD | Mean difference ± SD | P value | 95% LoA       |
|-------------------------------|--------------------------|------------------------|----------------------|---------|---------------|
| Sphere, D                     | 2.33 ± 1.66              | 1.99 ± 1.59            | 0.34 ± 0.41          | <0.0001 | -0.46 to 1.14 |
| Cylinder, D                   | -0.75 ± 0.48             | -0.57 ± 0.53           | -0.18 ± 0.37         | <0.0001 | -0.91 to 0.55 |
| Spherical equivalent, D       | 1.96 ± 1.64              | 1.71 ± 1.54            | 0.25 ± 0.41          | <0.0001 | -0.55 to 1.05 |
| Inter-eye VDD, D <sup>a</sup> | 0.85 ± 0.58              | 0.65 ± 0.51            | 0.19 ± 0.44          | <0.0001 | -0.67 to 1.05 |

D, diopter; LoA, limits of agreement; SD, standard deviation; VDD, vector dioptic distance.

<sup>a</sup>Three subjects with missing data in axis from the Retinomax were excluded.

eTable 3. Frequency distribution of refractive error measurements differences between autorefractors by categories

| Refractive error difference: Grand Seiko – Retinomax, D | Sphere, no. eyes (%) | Spherical equivalent, no. eyes (%) | Cylinder, no. eyes (%) |
|---------------------------------------------------------|----------------------|------------------------------------|------------------------|
| ≤ -1                                                    | 2 (0.1)              | 4 (0.3)                            | 35 (2.5)               |
| > -1, ≤ -0.75                                           | 8 (0.6)              | 12 (0.9)                           | 108 (7.7)              |
| > -0.75, ≤ -0.5                                         | 35 (2.5)             | 40 (2.9)                           | 245 (17.5)             |
| > -0.5, ≤ -0.25                                         | 108 (7.7)            | 123 (8.8)                          | 394 (28.1)             |
| > -0.25, <0.25                                          | 268 (19.1)           | 456 (32.5)                         | 368 (26.2)             |
| ≥0.25, <0.5                                             | 379 (27.0)           | 351 (25.0)                         | 179 (12.8)             |
| ≥0.50, <0.75                                            | 297 (21.2)           | 233 (16.6)                         | 60 (4.3)               |
| ≥0.75, <1.00                                            | 184 (13.1)           | 113 (8.1)                          | 11 (0.8)               |
| ≥1.00                                                   | 123 (8.8)            | 72 (5.1)                           | 4 (0.3)                |

eTable 4. Univariate analysis for factors associated with difference in refractive error measurements between the Grand Seiko and the Retinomax autorefractors

| Factor                                          | No. eyes | Mean difference $\pm$ SD |              |                         |             |
|-------------------------------------------------|----------|--------------------------|--------------|-------------------------|-------------|
|                                                 |          | Sphere, D                | Cylinder, D  | Spherical equivalent, D | VDD, D      |
| Age, months, at eye exam                        |          |                          |              |                         |             |
| $\leq 53$                                       | 346      | 0.39 (0.45)              | -0.19 (0.37) | 0.29 (0.45)             | 0.20 (0.48) |
| 54-59                                           | 482      | 0.31 (0.39)              | -0.17 (0.36) | 0.22 (0.40)             | 0.17 (0.40) |
| 60-65                                           | 436      | 0.34 (0.41)              | -0.18 (0.39) | 0.26 (0.42)             | 0.21 (0.46) |
| 66 to $<72$                                     | 140      | 0.31 (0.40)              | -0.22 (0.32) | 0.20 (0.37)             | 0.23 (0.41) |
| P value <sup>a</sup>                            |          | 0.12                     | 0.53         | 0.15                    | 0.63        |
| Sex                                             |          |                          |              |                         |             |
| Female                                          | 750      | 0.35 (0.43)              | -0.17 (0.38) | 0.26 (0.42)             | 0.19 (0.46) |
| Male                                            | 654      | 0.33 (0.40)              | -0.19 (0.35) | 0.23 (0.41)             | 0.20 (0.41) |
| P value                                         |          | 0.46                     | 0.33         | 0.26                    | 0.74        |
| Race                                            |          |                          |              |                         |             |
| African American                                | 974      | 0.32 (0.42)              | -0.18 (0.37) | 0.23 (0.41)             | 0.19 (0.44) |
| Non-African American                            | 430      | 0.39 (0.41)              | -0.18 (0.35) | 0.30 (0.42)             | 0.20 (0.44) |
| P value                                         |          | 0.02                     | 0.71         | 0.01                    | 0.80        |
| Spherical equivalent <sup>b</sup>               |          |                          |              |                         |             |
| $\leq 4.0$ D                                    | 1274     | 0.31 (0.39)              | -0.18 (0.37) | 0.21 (0.40)             | 0.19 (0.43) |
| $> 4.0$ D                                       | 130      | 0.67 (0.45)              | -0.15 (0.32) | 0.60 (0.44)             | 0.28 (0.47) |
| P value                                         |          | $<0.0001$                | 0.009        | $<0.0001$               | 0.07        |
| Accommodative error in Grand Seiko <sup>c</sup> |          |                          |              |                         |             |
| $\leq 1.35$ D                                   | 615      | 0.36 (0.40)              | -0.18 (0.37) | 0.27 (0.39)             | 0.18 (0.42) |
| $> 1.35$ D                                      | 78       | 0.54 (0.47)              | -0.21 (0.33) | 0.44 (0.51)             | 0.29 (0.56) |
| P value                                         |          | 0.0003                   | 0.47         | 0.0008                  | 0.046       |
| Any strabismus or suspected amblyopia           |          |                          |              |                         |             |
| No                                              | 1338     | 0.33 (0.41)              | -0.18 (0.37) | 0.24 (0.41)             | 0.19 (0.43) |
| Yes                                             | 66       | 0.48 (0.48)              | -0.12 (0.38) | 0.42 (0.46)             | 0.24 (0.49) |
| P value                                         |          | 0.06                     | 0.18         | 0.01                    | 0.53        |

SD, standard deviation; D, diopter; VDD, vector dioptic distance.

<sup>a</sup>Test for any difference among age groups.

<sup>b</sup>Based on the mean value from cycloplegic Grand Seiko and Retinomax autorefraction.

<sup>c</sup>Only the right eye was measured for accommodation using the Grand Seiko.

eTable 5. Multivariate analysis for the factors associated with differences in refractive error measurements between the Grand Seiko and Retinomax autorefractors<sup>a</sup>

| Factors                                         | No. eyes | Mean difference $\pm$ SD |                         |
|-------------------------------------------------|----------|--------------------------|-------------------------|
|                                                 |          | Sphere, D                | Spherical equivalent, D |
| Spherical equivalent <sup>b</sup>               |          |                          |                         |
| $\leq 4.0$ D                                    | 627      | 0.35 $\pm$ 0.40          | 0.26 $\pm$ 0.39         |
| $> 4.0$ D                                       | 66       | 0.66 $\pm$ 0.42          | 0.57 $\pm$ 0.42         |
| P value                                         |          | $<0.0001$                | $<0.0001$               |
| Accommodative error by Grand Seiko <sup>a</sup> |          |                          |                         |
| $\leq 1.35$ D                                   | 615      | 0.38 $\pm$ 0.40          | 0.29 $\pm$ 0.39         |
| $> 1.35$ D                                      | 78       | 0.44 $\pm$ 0.47          | 0.33 $\pm$ 0.51         |
| P value                                         |          | 0.24                     | 0.40                    |
| Any strabismus or suspected amblyopia           |          |                          |                         |
| No                                              | 660      | 0.38 $\pm$ 0.41          | 0.29 $\pm$ 0.40         |
| Yes                                             | 33       | 0.43 $\pm$ 0.47          | 0.37 $\pm$ 0.44         |
| P value                                         |          | 0.50                     | 0.28                    |
| Race                                            |          |                          |                         |
| African American                                | 479      | 0.38 $\pm$ 0.42          | 0.29 $\pm$ 0.40         |
| Non-African American                            | 214      | 0.39 $\pm$ 0.41          | 0.30 $\pm$ 0.42         |
| P value                                         |          | 0.85                     | 0.77                    |

D, diopter; SD, standard deviation.

<sup>a</sup>Because only the right eye was measured for accommodation using Grand Seiko, this multivariate analysis included only data from the right eye.

<sup>b</sup>Based on the mean value from cycloplegic Grand Seiko and Retinomax autorefraction.
